# Supplementary material for: Homocysteine Metabolism Pathway Is Involved in the Control of Glucose Homeostasis: A Cystathionine Beta Synthase Deficiency Study in Mouse
Source: MDPI journal article supplement (doi:10.3390/cells11111737), 2022-05-25
Supplement: s1 [file s1]

# Supplemental data

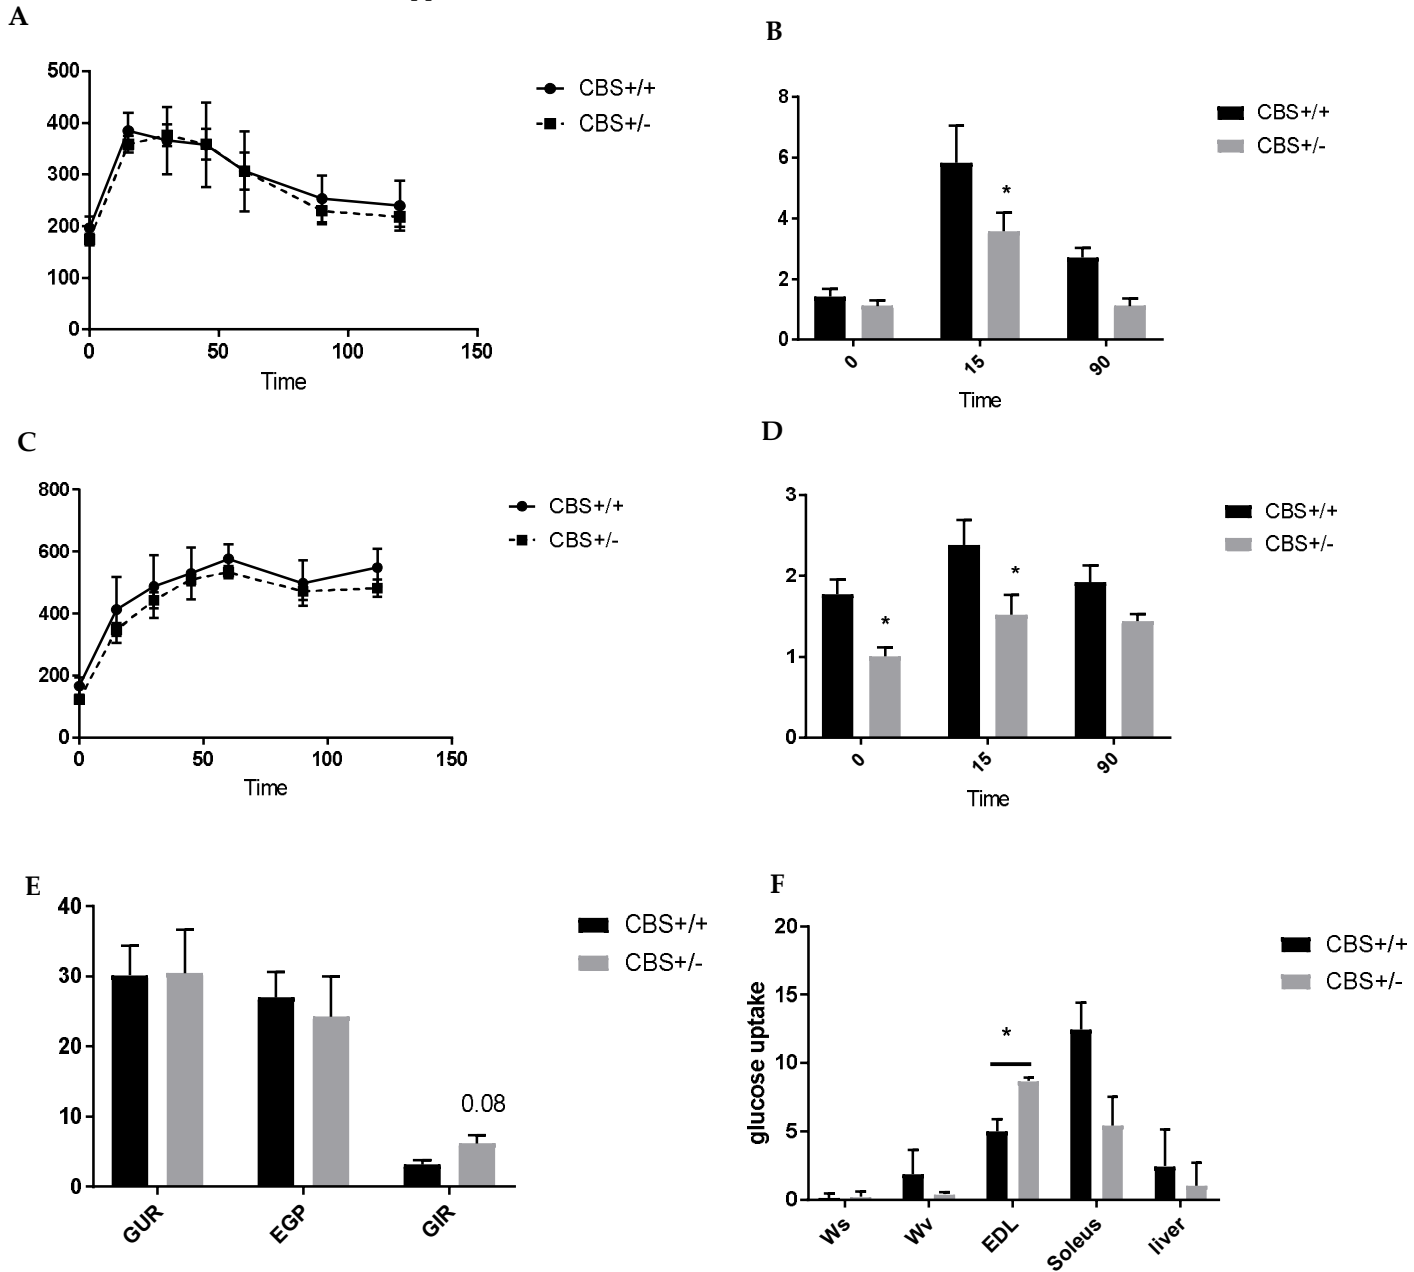

**Supplemental Figure S1: Glucose homeostasis in Met-HF CBS+/- and Met-HF CBS+/+ mice.** A. Oral glucose tolerance test 2g/kg bw. B. Insulin secretion at baseline and in response to OGTT. C. Intraperitoneal glucose tolerance test 2g/kg bw. D. Insulin secretion at baseline and in response to ipGTT. E. Glucose turnover rate : glucose utilization rate (GUR), Endogenous glucose production (EGP) and Glucose infusion rate during euglycemic-hyperinsulinemic clamps. F. Glucose uptake per tissue. Data are means +/- sem. \*  $p < 0.05$  vs. CBS +/+. Analysis by two-way ANOVA with post hoc Bonferroni test.

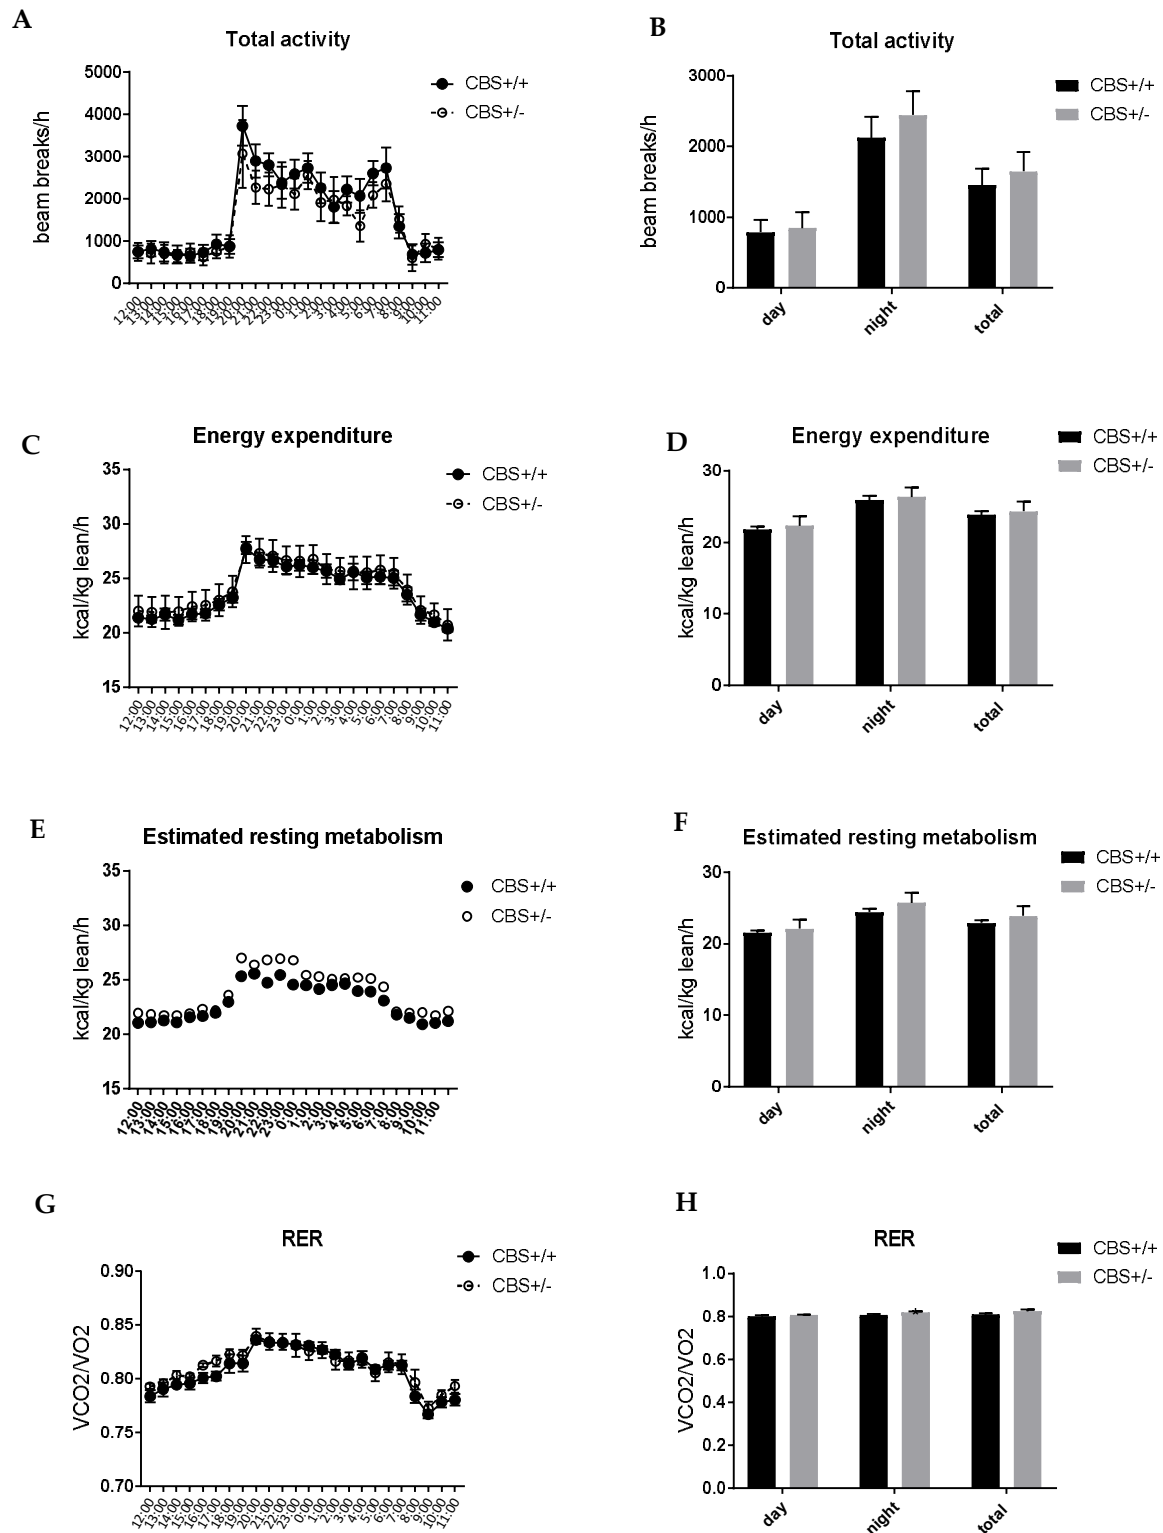

**Supplemental Figure S2. Met-HF CBS+/- mice do not display metabolic change.**

A, B. Total activity. C, D. Energy Expenditure. E, F. Estimated resting metabolism; G, H Respiratory Exchange Ratio (RER) of mice exposed to a high fat diet and supplemented with 0.5% methionine in drinking water. Data are represented as a representative line figure (A, C, E and G) over 24h (mean of 5 experimental days), and a bars graph showing the mean of daylight, night and 24h values (B, D, F and H). Values are expressed as mean  $\pm$  sem of 5 animals minimum per group.

## Supplemental Table S1

List of primers used.

|                    |                             |
|--------------------|-----------------------------|
| Adra2a_m_S         | tagaactgacttttcttccgtctc    |
| Adra2a_m_AS        | aacatacacgctcttcttaagc      |
| M3_m_S             | ttcccatcatgatacacacca       |
| M3_m_AS            | aatgtcacgtgcttggtcac        |
| CBS_m_S            | cggatgacctgcattcatct        |
| CBS_m_AS           | gaagtggagctatcagagcat       |
| Gck_m_S            | ggccaccaagaaggaaaaggta      |
| Gck_m_AS           | cgtaggtgggcaacatctttaca     |
| Cx36_m_S           | atatccccagccagtcctct        |
| Cx36_m_AS          | cttaatgcaggcaacactgg        |
| Glucagon_m_S       | tacacctgttcgagctcag         |
| Glucagon_m_AS      | ttgcaccagcattataagcaa       |
| Glut2_m_S          | tcttcacggctgtctctgtg        |
| Glut2_m_AS         | aatcatcccggtaggaaca         |
| Ins1_m_S           | cagagaggaggtactttggactataaa |
| Ins1_m_AS          | gccatgttgaaacaatgacct       |
| Ins2_m_S           | gaagtggaggaccacaagt         |
| Ins2_m_AS          | agtccaaggtctgaaggtc         |
| Pdx1_m_S           | gaaatccaccaaagctcacg        |
| Pdx1_m_AS          | cgggttccgctgtgtaag          |
| Pax6_m_S           | caccagactcacctgacacc        |
| Pax6_m_AS          | accgcccttggttaaagtc         |
| Nkx6.1_m_S         | gagttaggaggtcccaagg         |
| Nkx6.1_m_AS        | ttgctgctttcaaaccctct        |
| Nkx2.2_m_S         | tgtcccagagtcacggagt         |
| Nkx2.2_m_AS        | agggcttaagatgcctggat        |
| Mafa_m_S           | ctccagagccaggtggag          |
| Mafa_m_AS          | gtacaggtcccgtccttg          |
| Ldha_m_S           | cgccctctgctcttgattt         |
| Ldha_m_AS          | catcaccagagccctacag         |
| Rfx6_m_S           | ctgcaggaaaagaaaactgga       |
| Rfx6_m_AS          | ggaaatttttggaattgtc         |
| MCT1_m_S           | ggatatcatctataatgttggtgtc   |
| MCT1_m_AS          | gctgccgtatttattcaccaa       |
| Somatostatine_m_S  | cccagactccgtcagtttct        |
| Somatostatine_m_AS | gggcatcattctctgtctgg        |

**Supplemental Table S2.** Spearman correlations for 6 genes involved in homocysteine metabolism and phenotypic traits. Significant *p*-values < 0.05 are in bold and italic.

| Symbol        | Module    | Module_Membership | Insulin Resistance |                           | Stimulated Insulinemia |                           | Basal Glycemia  |                           | Glucose Intolerance |                          |
|---------------|-----------|-------------------|--------------------|---------------------------|------------------------|---------------------------|-----------------|---------------------------|---------------------|--------------------------|
|               |           |                   | R(Spearman)        | <i>p</i> -value           | R(Spearman)            | <i>p</i> -value           | R(Spearman)     | <i>p</i> -value           | R(Spearman)         | <i>p</i> -value          |
| <i>Cbs</i>    | blue      | 0.895006292       | 0.748194014        | <b><i>0.000355568</i></b> | 0.073290835            | 0.552534561               | -0.24822652     | 0.09623854                | -0.031453329        | 0.83561374               |
| <i>Dyrk1a</i> | turquoise | 0.731517373       | -0.663570691       | <b><i>0.002677984</i></b> | 0.013016758            | 0.916095457               | 0.126827467     | 0.4009576                 | 0.237256776         | 0.11236968               |
| <i>Mat1a</i>  | grey      | -0.048717701      | -0.110423117       | 0.662698431               | -0.025995343           | 0.833336483               | 0.41761768      | <b><i>0.00388057</i></b>  | -0.32711462         | <b><i>0.02648781</i></b> |
| <i>Mthfr</i>  | brown     | 0.495739946       | 0.1124871          | 0.656756563               | -0.077947857           | 0.527504521               | 0.066683118     | 0.65971191                | -0.285731907        | 0.05423705               |
| <i>Mtr</i>    | turquoise | 0.784134672       | -0.543859649       | <b><i>0.019643564</i></b> | -0.067412299           | 0.58492035                | -0.014434644    | 0.92414713                | 0.0853557           | 0.57274764               |
| <i>Ahcy</i>   | yellow    | 0.899791622       | -0.73993808        | <b><i>0.000447266</i></b> | -0.279383135           | <b><i>0.021038604</i></b> | 0.616680051     | <b><i>0.000050293</i></b> | -0.313731537        | <b><i>0.0337369</i></b>  |
| Symbol        | Module    | Module_Membership | Basal Insulinemia  |                           | T15 Insulinemia        |                           | T90 Insulinemia |                           | Plasma SMs Average  |                          |
|               |           |                   | R(Spearman)        | <i>p</i> -value           | R(Spearman)            | <i>p</i> -value           | R(Spearman)     | <i>p</i> -value           | R(Spearman)         | <i>p</i> -value          |
| <i>Cbs</i>    | blue      | 0.895006292       | 0.345268542        | <b><i>0.003931356</i></b> | 0.253998549            | <b><i>0.036608411</i></b> | 0.35041275      | <b><i>0.00339506</i></b>  | 0.570691434         | <b><i>0.01338428</i></b> |
| <i>Dyrk1a</i> | turquoise | 0.731517373       | -0.203343894       | 0.096281472               | -0.110203458           | 0.370978568               | -0.188481176    | 0.12373789                | -0.477812178        | <b><i>0.04491215</i></b> |
| <i>Mat1a</i>  | grey      | -0.048717701      | 0.325266252        | <b><i>0.006799483</i></b> | 0.208420812            | 0.088081834               | 0.126888391     | 0.3024825                 | -0.325077399        | 0.18808478               |
| <i>Mthfr</i>  | brown     | 0.495739946       | 0.051418101        | 0.677103283               | -0.026567928           | 0.829719856               | -0.146280479    | 0.23392404                | -0.261093911        | 0.2953326                |
| <i>Mtr</i>    | turquoise | 0.784134672       | -0.224834905       | 0.065279297               | -0.171584533           | 0.161785948               | -0.137042516    | 0.26510868                | -0.356037152        | 0.14702555               |
| <i>Ahcy</i>   | yellow    | 0.899791622       | 0.027255029        | 0.825384558               | -0.069664465           | 0.572411246               | -0.166226082    | 0.17549127                | -0.364293086        | 0.13721672               |
